# Supplementary material for: Lumbo-pelvic proprioception in sitting is impaired in subgroups of low back pain–But the clinical utility of the differences is unclear. A systematic review and meta-analysis
Source: PubMed Central journal article supplement (PMC8075231; doi:10.1371/journal.pone.0250673), 2021-04-26
Supplement: pone.0250673.s003.pdf [file pone.0250673.s003.pdf]

## Online supplementary material 1:

### Electronic database search strategy in PubMed

((((((((((((((((((((((((Differential Threshold) OR joint sense) OR just noticeable difference) OR Kinesthesia) OR Kinesthes\*) OR kinesthetic perception) OR mechanoreceptors) OR movement sense) OR motion sense) OR Muscle Spindles) OR Muscle Spindle) OR position sense) OR propriocept\*) OR proprioception) OR repositioning) OR reposition\*))

### AND

((((((((((((((((((((((((Spondylosis[Title/Abstract] OR Sciatic Neuropathy[Title/Abstract] OR Sciatica[Title/Abstract] OR lumbar trouble[Title/Abstract] OR lumbar symptoms[Title/Abstract] OR lumbar pain[Title/Abstract] OR lumbar injur\*[Title/Abstract] OR lumbar dysfunction[Title/Abstract] OR lumbar disorder\*[Title/Abstract] OR lumbar complaints[Title/Abstract] OR (low back pain[Title/Abstract] OR low-back pain[Title/Abstract])) OR lumbago[Title/Abstract] OR dorsalgia[Title/Abstract] OR coccydynia[Title/Abstract] OR Coccyx[Title/Abstract] OR back trouble[Title/Abstract] OR back symptoms[Title/Abstract] OR Back Pain[Title/Abstract] OR back injur\*[Title/Abstract] OR Back Injuries[Title/Abstract] OR back dysfunction[Title/Abstract] OR back disorder[Title/Abstract] OR back complaints[Title/Abstract] OR backache[Title/Abstract])) AND Humans[Mesh]))

### NOT

(surgery[Title/Abstract] OR systematic review[Title/Abstract]) AND Humans[Mesh]) NOT (((((neck pain AND Humans[Mesh])) OR (spine surgery AND Humans[Mesh])) OR (cauda equina AND Humans[Mesh])) AND Humans[Mesh])

Filters: Humans
